# Supplementary material for: An Aminosteroid Derivative Shows Higher In Vitro and In Vivo Potencies than Gold Standard Drugs in Androgen-Dependent Prostate Cancer Models
Source: MDPI journal article supplement (doi:10.3390/cancers15113033), 2023-06-02
Supplement: s1 [file s1]

## Supplementary Materials

# An Aminosteroid Derivative Shows Higher In Vitro and In Vivo Potencies than Gold Standard Drugs in Androgen-Dependent Prostate Cancer Models

Donald Poirier,<sup>1,2,\*</sup> Jenny Roy,<sup>1</sup> René Maltais,<sup>1</sup> Cindy Weidmann,<sup>1</sup> Étienne Audet-Walsh<sup>1,2</sup>

<sup>1</sup>Endocrinology and Nephrology Unit, CHU de Québec Research Center-Université Laval, Pavillon CHUL, Québec, QC, G1V 4G2, Canada

<sup>2</sup>Department of Molecular Medicine, Faculty of Medicine, Université Laval, Québec, QC, G1V 0A6, Canada

**Content:** Figure S1, Figure S2, Figure S3, Table S1, Table S2 and Table S3

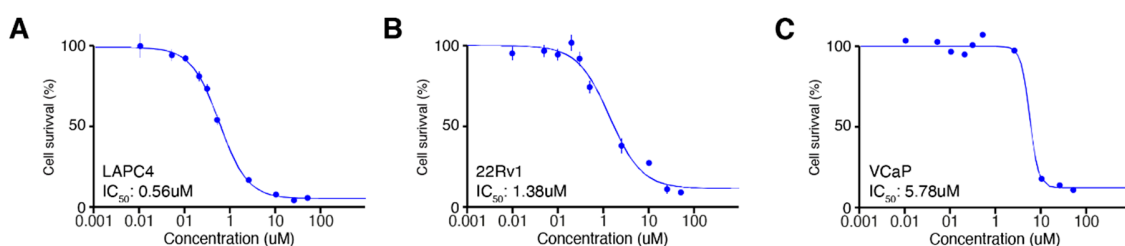

**Figure S1.** Efficacy of RM-581 in reducing the LAPC-4 (A), 22Rv1 (B) and VCaP (C) cell proliferation after 3 days of treatment (LAPC-4 and 22Rv1) or 7 days of treatment (VCaP). Results from one representative experiment out of 2-4 independent experiments performed with 8 replicates per conditions are shown. Concentration is shown in log<sub>10</sub> scale.

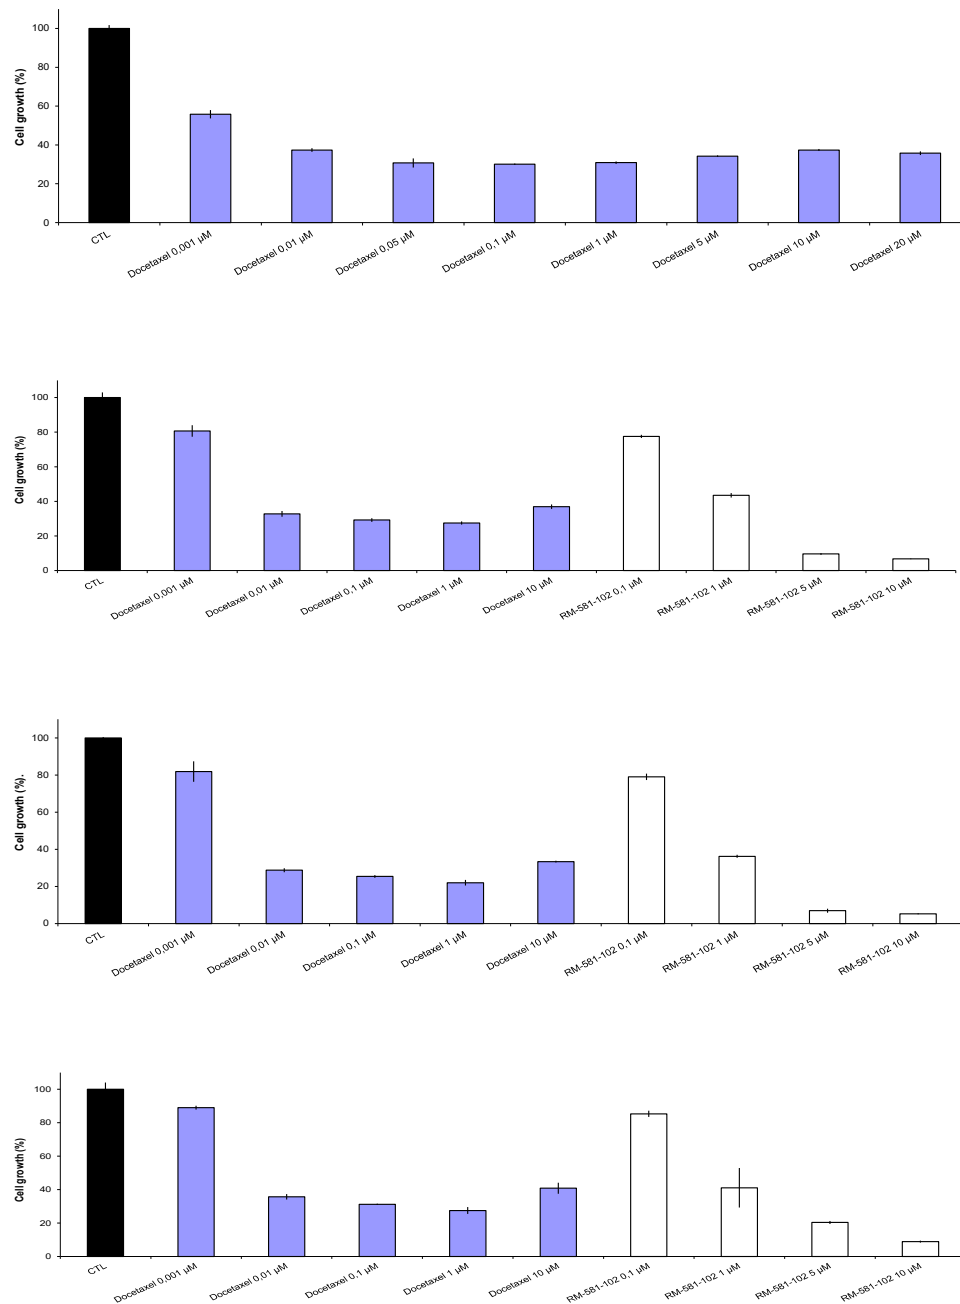

**Figure S2.** Efficacy of docetaxel and RM-581 in reducing LAPC-4 cell proliferation after 6 days of treatment. **A)** Standard cell culture protocol with change of medium, **B)** with an initial washing of the cells, **C)** with an initial washing of the cells and without change of medium, and **D)** without an initial washing of the cells and with change of medium. For docetaxel, results are the mean of 4 experiments performed in triplicate. For docetaxel,  $IC_{50}$  value was not calculated. For RM-581, results are the mean of 3 experiments performed in triplicate with  $IC_{50} = 0.51, 0.47$  and  $0.73 \mu M$ . Mean  $IC_{50} = 0.57 \pm 0.14 \mu M$ .

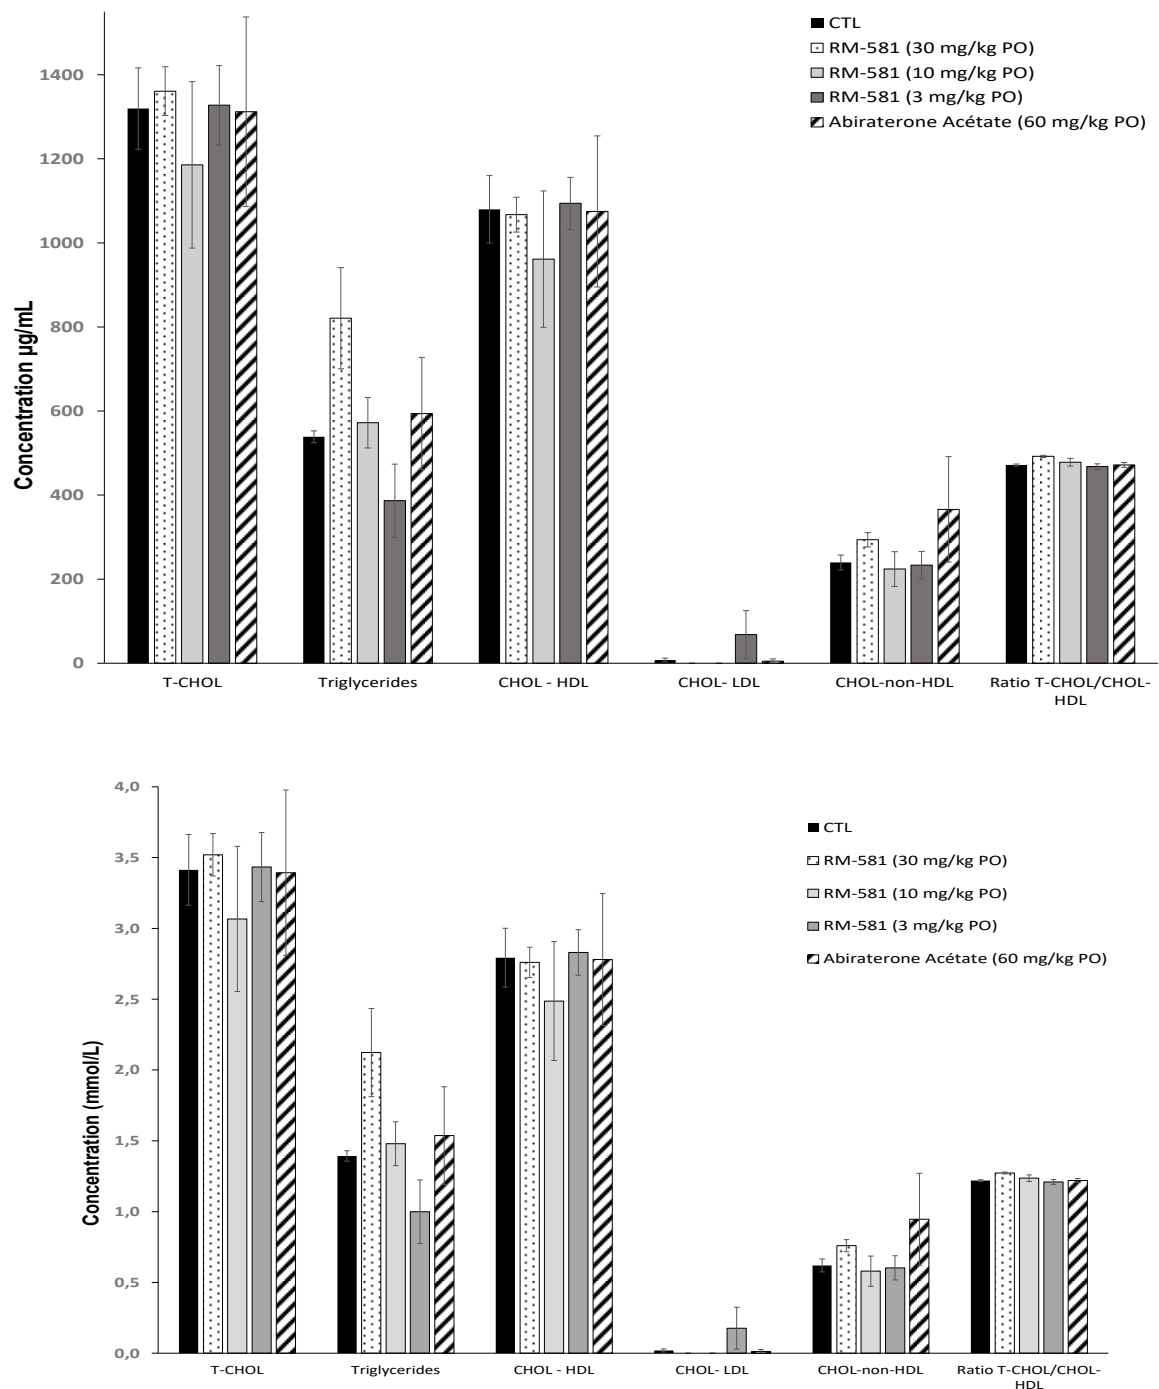

**Figure S3.** Concentrations in µg/mL (up) or mmol/L (down) of total cholesterol, triglycerides, cholesterol-HDL, cholesterol-LDL, cholesterol non-HDL and ratio of total cholesterol/cholesterol-HDL obtained from LAPC-4 xenograft experiments with RM-581 (3, 10 and 30 mg/kg/PO) and abiraterone acetate (60 mg/kg/PO). Method B (Medical Laboratory of CHU de Québec/L'Enfant Jésus Hospital).

**Table S1.** Content of 56 fatty acids detected in tumors treated with RM-581 (10 mg/kg) or not (CTL) from LAPC-4 xenograft experiment in mice.

| <b>Fatty Acid (FA) Content<sup>1</sup></b>  | <b>Series</b> | <b>FA<br/>(double<br/>bond)</b> | <b>FA<br/>RM-581<br/>% of total</b> | <b>FA<br/>CTL<br/>(mg/g)</b> | <b>FA<br/>RM-581<br/>(mg/g)</b> | <b>%<sup>2</sup></b> |
|---------------------------------------------|---------------|---------------------------------|-------------------------------------|------------------------------|---------------------------------|----------------------|
| <b><i>More abundant FA (&gt; 0.5%)</i></b>  |               |                                 |                                     |                              |                                 |                      |
| Palmitic acid                               | -             | 16:0                            | 20.8                                | 4.395                        | 5.095                           | + <b>16</b>          |
| Oleic acid (9c)                             | w9            | 18:1                            | 20.1                                | 3.665                        | 4.920                           | + <b>34</b>          |
| Linoleic acid (9c12c)                       | w6            | 18:2                            | 18.1                                | 2.840                        | 4.435                           | + <b>56</b>          |
| Stearic acid                                | -             | 18:0                            | 9.61                                | 2.275                        | 2.355                           | + 3.5                |
| Arachidonic (5c8c11c14c)                    | w6            | 20:4                            | 8.77                                | 2.195                        | 2.150                           | - 2.1                |
| Palmitoleic acid (9c)                       | w7            | 16:1                            | 4.23                                | 0.680                        | 1.035                           | + <b>52</b>          |
| Vaccenic acid (11c)                         | w7            | 18:1                            | 2.82                                | 0.655                        | 0.690                           | + 5.3                |
| Dihomo- $\gamma$ -linolenic acid (8c11c14c) | w6            | 20:3                            | 2.35                                | 0.520                        | 0.580                           | + 12                 |
| Cervonic acid (4c7c10c13c16c19c)            | w3            | 22:6                            | 2.18                                | 0.530                        | 0.530                           | 0                    |
| Adrenic acid-1 (7c10c13c16c)                | w6            | 22:4                            | 1.54                                | 0.350                        | 0.380                           | + 8.6                |
| Myristic acid                               | -             | 14:0                            | 1.12                                | 0.220                        | 0.275                           | + <b>25</b>          |
| Adrenic acid-2 (4c7c10c13c16c)              | w6            | 22:5                            | 1.07                                | 0.295                        | 0.260                           | - 12                 |
| Alpha-linolenic acid (9c12c15c)             | w3            | 18:3                            | 0.94                                | 0.140                        | 0.230                           | + <b>64</b>          |
| Dimethoxyhexadecanoic acid                  | -             | 16:0                            | 0.68                                | 0.170                        | 0.170                           | 0                    |
| Lignoceric acid                             | -             | 24:0                            | 0.65                                | 0.130                        | 0.160                           | + 23                 |
| Docosapentaenoic acid(7c10c13c16c19c)       | w3            | 22:5                            | 0.57                                | 0.120                        | 0.140                           | + 17                 |
| Nervonic acid (15c)                         | w9            | 24:1                            | 0.52                                | 0.110                        | 0.130                           | + 18                 |
| <b><i>Less abundant FA (&lt; 0.5%)</i></b>  |               |                                 |                                     |                              |                                 |                      |
| Caprylic acid                               | --            | 8:0                             | 0                                   | 0                            | 0                               | --                   |
| Caproic acid                                | --            | 10:0                            | 0.02                                | 0                            | 0                               | --                   |
| Lauric acid                                 | --            | 12:0                            | 0.10                                | 0.02                         | 0.02                            | --                   |
| -- (9t)                                     | w5            | 14:1                            | 0.03                                | 0.01                         | 0.01                            | --                   |
| Myristoleic acid (9c)                       | w5            | 14:1                            | 0.06                                | 0.01                         | 0.02                            | --                   |
| Pentadecanoic acid                          | --            | 15:0                            | 0.17                                | 0.03                         | 0.04                            | --                   |
| -- (5t)                                     | w10           | 15:1                            | 0                                   | 0                            | 0                               | --                   |
| -- (5c)                                     | w10           | 15:1                            | 0                                   | 0                            | 0                               | --                   |
| -- (1c)                                     | w14           | 15:1                            | 0                                   | 0                            | 0                               | --                   |
| Palmitelaidic acid (9t)                     | w1            | 16:1                            | 0                                   | 0                            | 0                               | --                   |
| Isobranched                                 | --            | 17:0                            | 0.08                                | 0.02                         | 0.02                            | --                   |
| Dimethoxyoctadecanoic acid                  | --            | 18:0                            | 0.38                                | 0.075                        | 0.09                            | --                   |
| -- (7t)                                     | w10           | 17:1                            | 0.09                                | 0.02                         | 0.02                            | --                   |
| Dimethoxyoctadecenoic acid (9c)             | w9            | 18:1                            | 0.29                                | 0.055                        | 0.07                            | --                   |
| -- (7c)                                     | w10           | 17:1                            | 0.20                                | 0                            | 0.05                            | --                   |
| Petroselaidic acid (6t)                     | w12           | 18:1                            | 0                                   | 0                            | 0                               | --                   |
| Elaidic acid (9t)                           | w9            | 18:1                            | 0                                   | 0                            | 0                               | --                   |

|                                   |        |      |      |       |       |    |
|-----------------------------------|--------|------|------|-------|-------|----|
| Trans-vaccenic acid (11t)         | w7     | 18:1 | 0.13 | 0.03  | 0.03  | -- |
| Petroselinic acid (7c-n11/6c-n12) | w11/12 | 18:1 | 0    | 0     | 0     | -- |
| -- (12c)                          | w6     | 18:1 | 0    | 0     | 0     | -- |
| -- (13c)                          | w5     | 18:1 | 0.07 | 0.02  | 0.02  | -- |
| Linolelaidic acid (9t12t)         | w6     | 18:2 | 0.14 | 0.03  | 0.03  | -- |
| -- (9c12t)                        | w6     | 18:2 | 0.09 | 0.02  | 0.02  | -- |
| -- (9t12c)                        | w6     | 18:2 | 0    | 0     | 0     | -- |
| -- (9t12t15t)                     | w3     | 18:3 | 0.03 | 0.01  | 0.01  | -- |
| Arachidic acid                    | --     | 20:0 | 0.20 | 0.04  | 0.05  | -- |
| Gamma-linolenic acid (6c9c12c)    | w6     | 18:3 | 0.19 | 0.04  | 0.05  | -- |
| -- (8c)                           | w12    | 20:1 | 0    | 0     | 0     | -- |
| Gondoic acid (11c)                | w9     | 20:1 | 0.32 | 0.05  | 0.08  | -- |
| Stearidonic acid (6c9c12c15c)     | w3     | 18:4 | 0    | 0     | 0     | -- |
| -- (11c14c)                       | w6     | 20:2 | 0.34 | 0.06  | 0.08  | -- |
| Behenic acid                      | --     | 22:0 | 0.35 | 0.07  | 0.09  | -- |
| -- (9t)                           | w13    | 22:1 | 0    | 0     | 0     | -- |
| -- (11c14c17c)                    | w3     | 20:3 | 0    | 0     | 0     | -- |
| Erucic acid                       | w9     | 22:1 | 0.10 | 0.02  | 0.025 | -- |
| -- (8c11c14c17c)                  | w3     | 20:4 | 0.16 | 0.015 | 0.04  | -- |
| -- (13c16c)                       | w6     | 22:2 | 0.04 | 0.01  | 0.01  | -- |
| Timnodonic acid (5c8c11c14c17c)   | w3     | 20:5 | 0.10 | 0.02  | 0.025 | -- |
| -- (13c16c19c)                    | w3     | 22:3 | 0    | 0     | 0     | -- |

<sup>1</sup> RM-581 (10 mg/kg) was administrated orally (gavage) in mice (28 days of treatment). Control (CTL) mice received only the vehicle (PG:DMSO/92:8). <sup>2</sup> Calculated only for the 17 most abundant fatty acids (> 0.5%) whose concentration was measured by GC-FDI.

**Table S2.** Total cholesterol concentration in LAPC-4 cells treated 18, 36 and 72 h with the aminosteroid RM-581 (2  $\mu$ M) or atorvastatin (10  $\mu$ M).

| Time (h) | Control       | RM-581 (2 $\mu$ M) | Atorvastatin (10 $\mu$ M) |
|----------|---------------|--------------------|---------------------------|
| 18       | 65 $\pm$ 0.7  | 68 $\pm$ 3         | 59 $\pm$ 3.5              |
| 36       | 62 $\pm$ 1    | 69 $\pm$ 6         | 61 $\pm$ 0.4              |
| 72       | 66 $\pm$ 2    | 69 $\pm$ 4         | 70 $\pm$ 1                |
| 72       | 108 $\pm$ 6.5 | --                 | 50 $\pm$ 2                |

**Table S3.** Primer sequences for different genes

| <b>Gene</b>   | <b>Name</b> | <b>Primer sequences</b> |
|---------------|-------------|-------------------------|
| <i>ACLY</i>   | ACLY_F      | CGGACTTCGGCAGAGGTTAGA   |
|               | ACLY_R      | GTTGACCCCAACGAGACCAA    |
| <i>HMGCS1</i> | HMGCS1_F    | GTCACGCTTGTGCCCCGAA     |
|               | HMGCS1_R    | GCCGCCCAATGCAATCATAG    |
| <i>HMGCR</i>  | HMGCR_F     | TTCGGTGGCCTCTAGTGAGA    |
|               | HMGCR_R     | AAAGCTTCATTCAAGCCTGTCA  |
| <i>MVK</i>    | MVK_F       | GAGCCATGTTGTCAGAAGTCC   |
|               | MVK_R       | GTGACATCACCTTGCTCCAGAA  |
| <i>MVD</i>    | MVD_F       | TCATCAAGTACTGGGGCAAGC   |
|               | MVD_R       | GGTTTTTAACTGGTCCTGGTGC  |
| <i>ACAT1</i>  | ACAT1_F     | GGAGGCTGGTGCAGGAAATA    |
|               | ACAT1_R     | TCCTGATGTCCACACATAAGACT |
| <i>FASN</i>   | FASN_F      | ATGGAGGAGGTGGTGATTGC    |
|               | FASN_R      | CTGGGCCCTCTGAAGTCGAA    |
| <i>SCD1</i>   | SCD1_F      | AACAGCAGGAGCTCATCGTC    |
|               | SCD1_R      | AAGTTGATGTGCCAGCGGTA    |
| <i>LDLR</i>   | LDLR_F      | GAGGGCTCTGTCCATTGTCC    |
|               | LDLR_R      | ACCATCTGTCTCGAGGGGTA    |
